# Supplementary material for: Measuring the Impact of Environment on the Health of Large Cities
Source: PubMed Central journal article supplement (PMC6025373; doi:10.3390/ijerph15061216), 2018-06-09
Supplement: ijerph-15-01216-s001.pdf [file ijerph-15-01216-s001.pdf]

Table S1. Set of all indicators initially selected for the comparison of cities.

| Domain                                             | Indicator                                                                                                                                                                                              | DHS file to use for calculation | Variable (DHS VI) |
|----------------------------------------------------|--------------------------------------------------------------------------------------------------------------------------------------------------------------------------------------------------------|---------------------------------|-------------------|
| Environment                                        | Proportion of households with piped water into dwelling or yard/plot (on the premises)                                                                                                                 | Household Recode (HR)           | hv201/hv202       |
| Environment                                        | Proportion of households with access to improved sanitation as defined by WHO/UNICEF JMP                                                                                                               | Household Recode (HR)           | hv205             |
| Environment                                        | Proportion of households that are not using solid fuel for cooking in the home                                                                                                                         | Household Recode (HR)           | hv226             |
| Environment                                        | Proportion of households that do not have environmental tobacco smoke in the home ever                                                                                                                 | Household Recode                | hv252             |
| Chronic disease risk factors (Smoking (male))      | The percentage of males (15-49) who do not smoke cigarettes                                                                                                                                            | Male Recode (MR)                | mv463a            |
| Education                                          | Proportion of men (15-49) who can read all of a phrase on a card                                                                                                                                       | Male Recode (MR)                | mv155             |
| Education                                          | Proportion of men (15-49) who have completed secondary education                                                                                                                                       | Male Recode (MR)                | mv149             |
| Chronic disease risk factors (Smoking (female))    | The percentage of females (15-49) who do not smoke cigarettes                                                                                                                                          | Individual Recode               | v463a             |
| Infectious disease risk factors (Knowledge of HIV) | The percent of respondents (women 15-49) who, in response to a prompted question, say that people can protect themselves from contracting HIV by having sex only with one faithful, uninfected partner | Individual Recode (IR)          | v754dp            |
| Infectious disease risk factors (Knowledge of HIV) | The percent of respondents (women 15-49) who, in response to a prompted question, say that people can protect themselves from contracting HIV by using condoms                                         | Individual Recode (IR)          | v754cp            |
| Education                                          | Proportion of women (15-49) who can read all of a phrase on a card                                                                                                                                     | Individual Recode (IR)          | v155              |
| Education                                          | Proportion of women (15-49) who have completed secondary education                                                                                                                                     | Individual Recode (IR)          | v149              |
| Chronic disease risk factor (Body mass index)      | Proportion of non-pregnant women (15-49) who have a BMI < 30                                                                                                                                           | Individual Recode               | v213, v445, v447  |
| Child health and health coverage                   | Proportion of children (1-4 years of age) who have received all three doses of the DPT vaccine.                                                                                                        | Child Recode (KR)               | b8, h7            |
| Child health and health coverage                   | Proportion of children (1-4 years of age) who have received all three doses of the polio vaccine.                                                                                                      | Child Recode (KR)               | b8, h8            |
| Child health and health coverage                   | Proportion of children (1-4 years of age) who have received the measles vaccine.                                                                                                                       | Child Recode (KR)               | b8, h9            |

Table S2: Description of Demographic Health Surveys that contributed data

| Country                   | Year    | Country Code | Selected City        | Household Sample Size | Women Sample Size | Men Sample Size | Children Sample Size | Variables Used to Identify City Sample |
|---------------------------|---------|--------------|----------------------|-----------------------|-------------------|-----------------|----------------------|----------------------------------------|
| Albania                   | 2008    | AL           | <b>Tirana</b>        | 1366                  | 1142              | 520             | 177                  | V024=4 & V025=1                        |
| Armenia                   | 2010    | AM           | <b>Yerevan</b>       | 1149                  | 987               | 283             | 176                  | V024=11 & V025=1                       |
| Azerbaijan                | 2006    | AZ           | <b>Baku</b>          | 1166                  | 1312              | 422             | 201                  | V024=1 & V025=1                        |
| Bangladesh                | 2011    | BD           | <b>Dhaka</b>         | 1322                  | 1345              | 138             | 177                  | v024=3 & v025=1<br>& V023=3            |
| Benin                     | 2011-12 | BJ           | <b>Cotonou</b>       | 1913                  | 1949              | 508             | 861                  | V024=8 & V025=1                        |
| Bolivia                   | 2008    | BO           | <b>La Paz</b>        | 2513                  | 2315              | 798             | 694                  | v024=2 & v025=1                        |
| Burkina Faso              | 2010    | BF           | <b>Ouagadougou</b>   | 939                   | 1333              | 624             | 480                  | V024=3 & V025=1                        |
| Burundi                   | 2010    | BU           | <b>Bujumbura</b>     | 912                   | 1212              | 722             | 563                  | V024=1 & V025=1                        |
| Cambodia                  | 2010    | KH           | <b>Phnom Penh</b>    | 799                   | 1251              | 534             | 302                  | v024=8 & v025=1                        |
| Cameroon                  | 2011    | CM           | <b>Yaounde</b>       | 1156                  | 1352              | 570             | 573                  | V026=1 & V025=1 &<br>V024=12           |
| Chad                      | 2004    | TD           | <b>N'Djamena</b>     | 1169                  | 1324              | 549             | 900                  | V024=9 & V025=1                        |
| Colombia                  | 2010    | CO           | <b>Bogota</b>        | 3604                  | 3690              | x               | 781                  | v024=5 & v025=1                        |
| Comoros                   | 2012    | KM           | <b>Moroni</b>        | 770                   | 865               | 394             | 276                  | V023=7 & V025=1                        |
| Congo (Brazzaville)       | 2011-12 | CG           | <b>Brazzaville</b>   | 1173                  | 1180              | 584             | 580                  | V024=11 & V025=1                       |
| Congo Democratic Republic | 2013    | CD           | <b>Kinshasa</b>      | 1214                  | 1804              | 762             | 806                  | V024=1 & V025=1                        |
| Cote d'Ivoire             | 2011-12 | CI           | <b>Abidjan</b>       | 1137                  | 1400              | 641             | 515                  | V024=11& V025=1                        |
| Dominican Republic        | 2013    | DR           | <b>Santo Domingo</b> | 434                   | 343               | 343             | 103                  | sprovin=1                              |
| Ethiopia                  | 2011    | ET           | <b>Addis Ababa</b>   | 1524                  | 1741              | 1237            | 315                  | V024=14 & V025=1                       |

| Country         | Year    | Country Code | Selected City         | Household Sample Size | Women Sample Size | Men Sample Size | Children Sample Size | Variables Used to Identify City Sample |
|-----------------|---------|--------------|-----------------------|-----------------------|-------------------|-----------------|----------------------|----------------------------------------|
| Gabon           | 2012    | GA           | <b>Libreville</b>     | 1562                  | 1557              | 900             | 650                  | V024=1 & V025=1                        |
| Ghana           | 2008    | GH           | <b>Accra</b>          | 1481                  | 622               | 528             | 189                  | V024=3 & V025=1                        |
| Guinea          | 2012    | GN           | <b>Conakry</b>        | 1010                  | 1465              | 620             | 609                  | V024=2 & V025=1<br>& V026=0            |
| Guyana          | 2009    | GY           | <b>Georgetown</b>     | 598                   | 554               | 394             | 116                  | V024=4 & V026=0<br>& V025=1            |
| Haiti           | 2012    | HT           | <b>Port-au-Prince</b> | 1761                  | 2361              | 1365            | 665                  | v026=0                                 |
| Honduras        | 2011-12 | HN           | <b>Tegucigalpa</b>    | 1276                  | 1351              | 345             | 335                  | hv022=16                               |
| India           | 2005    | IA           | <b>New Delhi</b>      | 3109                  | 3105              | 1336            | 935                  | v024=7& v025=1<br>& V026=0             |
| India           | 2005    | IA           | <b>Kolkata</b>        | 2337                  | 2511              | 1065            | 503                  | v024=19 & v025=1<br>& V026=0           |
| India           | 2005    | IA           | <b>Mumbai</b>         | 4928                  | 5332              | 5301            | 1287                 | v024=27 & v025=1<br>& V026=0           |
| Indonesia       | 2012    | ID           | <b>Jakarta</b>        | 2118                  | 2391              | 466             | 614                  | v024==31 & v025==1                     |
| Jordan          | 2012    | JO           | <b>Amman</b>          | 1553                  | 1106              | x               | 661                  | V023=11 & V025=1                       |
| Kenya           | 2008-09 | KE           | <b>Nairobi</b>        | 1108                  | 952               | 399             | 322                  | V024=1 & V025=1<br>& V026=0            |
| Kyrgyz Republic | 2012    | KY           | <b>Bishkek</b>        | 918                   | 983               | 234             | 268                  | V024=8 & V025=1                        |
| Kyrgyz Republic | 2012    | KY           | <b>Osh</b>            | 737                   | 641               | 157             | 198                  | V024=9 & V025=1                        |

| Country    | Year      | Country Code | Selected City | Household Sample Size | Women Sample Size | Men Sample Size | Children Sample Size | Variables Used to Identify City Sample |
|------------|-----------|--------------|---------------|-----------------------|-------------------|-----------------|----------------------|----------------------------------------|
| Liberia    | 2013      | LB           | Monrovia      | 1062                  | 1293              | 505             | 512                  | hv023=21                               |
| Madagascar | 2008      | MD           | Antananarivo  | 1507                  | 1653              | 741             | 547                  | V024=11 & V025=1                       |
| Malawi     | 2010      | MW           | Lilongwe      | 432                   | 480               | 157             | 243                  | v026==0                                |
| Maldives   | 2009      | MV           | Male          | 944                   | 1041              | 274             | 371                  | V024=1                                 |
| Mali       | 2012-13   | ML           | Bamako        | 1579                  | 1970              | 811             | 1178                 | V024=9 & V025=1                        |
| Moldova    | 2005      | MB           | Chisinau      | 2922                  | 2031              | 623             | 285                  | V024=4 & V025=1                        |
| Morocco    | 2003-2004 | MA           | Casablanca    | 1290                  | 1837              | x               | 370                  | V024=9 & V025=1<br>& v026=0            |
| Mozambique | 2011      | MZ           | Maputo        | 1297                  | 1724              | 432             | 679                  | V024=11 & V025=1                       |
| Namibia    | 2013      | NM           | Windhoek      | 888                   | 1005              | 423             | 305                  | V024=6 & V025=1                        |
| Nepal      | 2011      | NP           | Kathmandu     | 509                   | 539               | 232             | 110                  | V023=5 & V025=1                        |
| Niger      | 2012      | NI           | Niamey        | 1135                  | 1379              | 562             | 799                  | V024=8 & V025=1<br>& V026=0            |
| Nigeria    | 2013      | NG           | Lagos         | 1729                  | 1482              | 701             | 753                  | HV022=71 & v025=1                      |
| Pakistan   | 2012      | PK           | Karachi       | 1290                  | 1184              | 308             | 620                  | v024=2 & v025=1<br>& V026=0            |

| Country | Year | Country Code | Selected City | Household Sample Size | Women Sample Size | Men Sample Size | Children Sample Size | Variables Used to Identify City Sample |
|---------|------|--------------|---------------|-----------------------|-------------------|-----------------|----------------------|----------------------------------------|
|---------|------|--------------|---------------|-----------------------|-------------------|-----------------|----------------------|----------------------------------------|

|                       |           |    |                      |      |      |       |     |                               |
|-----------------------|-----------|----|----------------------|------|------|-------|-----|-------------------------------|
| Pakistan              | 2012      | PK | <b>Islamabad</b>     | 828  | 627  | 193   | 361 | v024=6 & v025=1<br>& V026=0   |
| Peru                  | 2012      | PE | <b>Lima</b>          | 2179 | 2176 | x     | 492 | v024=15 & v025=1<br>& V026=0  |
| Philippines           | 2013      | PH | <b>Manila</b>        | 1683 | 2249 | x     | 638 | v024=1 & v025=1               |
| Rwanda                | 2010      | RW | <b>Kigali</b>        | 1269 | 1618 | 785   | 648 | V024=1 & V025=1               |
| Sao Tome and Principe | 2008-2009 | ST | <b>Sao Tome</b>      | 699  | 635  | 440   | 301 | V024 =1 & V025=1              |
| Senegal               | 2012-13   | SN | <b>Dakar</b>         | 395  | 549  | x     | 749 | V024=1 & V025=1               |
| Sierra Leone          | 2013      | SL | <b>Freetown</b>      | 1584 | 2337 | 1069? | 892 | V024=4 & V025=1               |
| Swaziland             | 2006-2007 | SZ | <b>Mbabane</b>       | 426  | 356  | 308   | 127 | V024=1 & V026=0<br>& V025=1   |
| Tajikistan            | 2012      | TJ | <b>Dushanbe</b>      | 1422 | 1733 | x     |     | V024=1 & V025=1               |
| Tanzania              | 2010      | TZ | <b>Dar es Salaam</b> | 352  | 410  | 100   | 158 | V024=7 & V025=1<br>& V026=0   |
| Timor-Leste           | 2009-10   | TL | <b>Dili</b>          | 880  | 1047 | 351   | 580 | v024=6 & v025=1               |
| Uganda                | 2011      | UG | <b>Kampala</b>       | 1062 | 1039 | 238   | 474 | V024=1 & V025=1               |
| Ukraine               | 2007      | UA | <b>Kyiv</b>          | 728  | 339  | 180   | 55  | V024=1 & V026=0               |
| Zambia                | 2007      | ZM | <b>Lusaka</b>        | 527  | 614  | 583   | 302 | V024=5 & V026=0<br>& V025 = 1 |
| Zimbabwe              | 2010-11   | ZW | <b>Harare</b>        | 1121 | 1196 | 894   | 445 | V024=9 & V025=1               |

Table S3: Values of indicators used to calculate the UHI

| <u>Country</u>                   | <u>City</u>   | <u>% piped onto premises</u> | <u>% improved sanitation</u> | <u>% not using solid fuels for cooking in the home</u> | <u>% women who completed secondary or higher</u> | <u>% women who believe condom prevents HIV</u> | <u>% women who believe having one partner prevents HIV</u> | <u>% with dpt3 age 1-4</u> | <u>% with polio 3 age 1-4</u> | <u>% with measles vaccine age 1-4</u> |
|----------------------------------|---------------|------------------------------|------------------------------|--------------------------------------------------------|--------------------------------------------------|------------------------------------------------|------------------------------------------------------------|----------------------------|-------------------------------|---------------------------------------|
| <b>Albania</b>                   | Tirana        | 94.80                        | 98.98                        | 97.58                                                  | 70.67                                            | 90.63                                          | 92.95                                                      | 100.00                     | 100.00                        | 99.44                                 |
| <b>Armenia</b>                   | Yerevan       | 99.13                        | 98.26                        | 100.00                                                 | 94.43                                            | 84.50                                          | 91.17                                                      | 94.15                      | 93.57                         | 94.12                                 |
| <b>Azerbaijan</b>                | Baku          | 90.21                        | 88.45                        | 99.92                                                  | 53.20                                            | 66.25                                          | 49.62                                                      | 86.67                      | 82.35                         | 89.76                                 |
| <b>Bangladesh</b>                | Dhaka         | 60.59                        | 33.51                        | 75.93                                                  | 36.41                                            | 70.63                                          | 77.35                                                      | 94.67                      | 94.08                         | 89.94                                 |
| <b>Benin</b>                     | Cotonou       | 66.44                        | 35.65                        | 28.54                                                  | 14.57                                            | 82.71                                          | 91.36                                                      | 75.67                      | 50.06                         | 87.29                                 |
| <b>Bolivia</b>                   | La Paz        | 95.90                        | 64.09                        | 98.53                                                  | 53.61                                            | 80.29                                          | 78.78                                                      | 80.47                      | 80.93                         | 78.65                                 |
| <b>Burkina Faso</b>              | Ouagadougou   | 48.35                        | 56.98                        | 37.38                                                  | 8.40                                             | 80.48                                          | 88.67                                                      | 87.95                      | 88.13                         | 92.27                                 |
| <b>Burundi</b>                   | Bujumbura     | 56.14                        | 33.99                        | 10.99                                                  | 12.95                                            | 93.48                                          | 88.64                                                      | 92.32                      | 85.58                         | 96.81                                 |
| <b>Cambodia</b>                  | Phnom Penh    | 83.35                        | 89.99                        | 75.91                                                  | 28.22                                            | 67.04                                          | 94.23                                                      | 91.64                      | 93.00                         | 90.67                                 |
| <b>Cameroon</b>                  | Yaoundé       | 39.97                        | 42.47                        | 77.99                                                  | 22.41                                            | 80.69                                          | 85.83                                                      | 78.57                      | 64.82                         | 84.27                                 |
| <b>Chad</b>                      | N'Djamena     | 53.94                        |                              |                                                        | 7.10                                             | 52.35                                          | 72.12                                                      | 50.40                      | 47.82                         | 57.62                                 |
| <b>Colombia</b>                  | Bogotá        | 99.86                        | 90.21                        | 99.97                                                  | 60.22                                            | 82.06                                          | 75.11                                                      | 94.05                      | 75.43                         | 92.41                                 |
| <b>Comoros</b>                   | Moroni        | 41.56                        | 24.03                        | 82.08                                                  | 28.21                                            | 79.51                                          | 84.46                                                      | 71.26                      | 69.35                         | 76.15                                 |
| <b>Congo</b>                     | Brazzaville   | 43.99                        | 13.64                        | 42.56                                                  | 18.47                                            | 77.75                                          | 84.23                                                      | 61.29                      | 47.75                         | 86.60                                 |
| <b>Congo Democratic Republic</b> | Kinshasa      | 48.93                        | 19.69                        | 24.77                                                  | 43.46                                            | 69.19                                          | 85.41                                                      | 84.54                      | 72.46                         | 93.96                                 |
| <b>Cote d'Ivoire</b>             | Abidjan       | 87.32                        | 40.99                        | 71.16                                                  | 14.36                                            | 74.22                                          | 79.08                                                      | 78.15                      | 72.67                         | 82.31                                 |
| <b>Dominican Republic</b>        | Santo Domingo | 94.83                        | 82.49                        | 98.85                                                  | 52.77                                            | 83.09                                          | 90.38                                                      | 81.71                      | 58.59                         | 91.03                                 |
| <b>Ethiopia</b>                  | Addis Ababa   | 72.24                        | 18.70                        | 45.41                                                  | 28.20                                            | 82.61                                          | 65.65                                                      | 88.63                      | 82.72                         | 94.00                                 |
| <b>Gabon</b>                     | Libreville    | 82.22                        | 40.85                        | 99.42                                                  | 16.89                                            | 85.03                                          | 89.18                                                      | 47.39                      | 30.05                         | 80.20                                 |
| <b>Ghana</b>                     | Accra         | 44.50                        | 25.93                        | 48.95                                                  | 34.08                                            | 77.15                                          | 89.77                                                      | 89.20                      | 84.83                         | 96.07                                 |
| <b>Guinea</b>                    | Conakry       | 56.44                        | 34.36                        | 6.44                                                   | 15.36                                            | 76.65                                          | 84.07                                                      | 52.65                      | 50.09                         | 82.12                                 |
| <b>Guyana</b>                    | Georgetown    | 87.12                        | 92.98                        | 100.00                                                 | 51.81                                            | 94.03                                          | 93.84                                                      | 84.55                      | 63.64                         | 84.55                                 |

|                                 |                |       |       |        |       |       |       |       |       |       |
|---------------------------------|----------------|-------|-------|--------|-------|-------|-------|-------|-------|-------|
| <b>Haiti</b>                    | Port-au-Prince | 6.94  | 39.92 | 16.64  | 14.99 | 87.10 | 94.10 | 63.40 | 55.08 | 67.01 |
| <b>Honduras</b>                 | Tegucigalpa    | 93.42 | 72.65 | 93.57  | 40.61 | 77.67 | 93.10 | 94.14 | 95.05 | 93.60 |
| <b>India-Delhi</b>              | Delhi          | 70.34 | 54.91 | 89.58  | 33.17 | 83.14 | 89.69 | 74.68 | 82.08 | 80.42 |
| <b>India-Kolkata</b>            | Kolkata        | 46.38 | 41.85 | 84.04  | 24.05 | 66.10 | 75.11 | 82.73 | 86.08 | 84.02 |
| <b>India - Mumbai</b>           | Mumbai         | 81.29 | 51.44 | 88.86  | 28.24 | 73.33 | 80.46 | 79.03 | 81.95 | 88.74 |
| <b>Indonesia</b>                | Jakarta        | 14.73 | 80.17 | 99.57  | 57.01 | 53.33 | 68.68 | 77.03 | 79.00 | 84.89 |
| <b>Jordan</b>                   | Amman          | 51.86 | 99.71 | 100.00 | 44.22 | 55.57 | 75.74 | 99.38 | 99.38 | 97.82 |
| <b>Kenya</b>                    | Nairobi        | 82.49 | 50.00 | 87.07  | 58.19 | 86.85 | 96.50 | 83.50 | 59.60 | 95.39 |
| <b>Kyrgyz Republic - Bishek</b> | Bishkek        | 98.04 | 90.52 | 99.67  | 89.32 | 78.96 | 88.88 | 73.54 | 59.62 | 95.38 |
| <b>Kyrgyz Republic- Osh</b>     | Osh            | 89.82 | 98.91 | 98.24  | 76.44 | 58.17 | 75.04 | 96.24 | 88.72 | 97.42 |
| <b>Liberia</b>                  | Monrovia       | 3.20  | 27.68 | 4.33   | 22.51 | 83.49 | 86.51 | 81.34 | 70.34 | 84.60 |
| <b>Madagascar</b>               | Antananarivo   | 27.80 | 19.58 | 9.10   | 24.56 | 88.44 | 92.52 | 87.79 | 78.57 | 89.15 |
| <b>Malawi</b>                   | Lilongwe       | 44.21 | 23.84 | 13.69  | 27.50 | 69.67 | 86.19 | 91.00 | 73.93 | 97.62 |
| <b>Maldives</b>                 | Male           | 92.05 | 97.03 | 100.00 | 15.85 | 84.68 | 95.56 | 97.77 | 92.82 | 94.75 |
| <b>Mali</b>                     | Bamako         | 32.68 | 40.22 | 5.45   | 9.04  | 76.60 | 82.33 | 72.96 | 50.63 | 84.34 |
| <b>Moldova</b>                  | Chisinau       | 89.14 | 88.81 | 99.86  | 56.08 | 86.45 | 88.04 | 93.17 | 96.40 | 97.36 |
| <b>Morocco</b>                  | Casablanca     | 85.27 | 86.59 | 99.69  | 14.40 | 60.51 | 93.29 | 97.49 | 97.48 | 94.96 |
| <b>Mozambique</b>               | Maputo         | 64.69 | 31.61 | 33.33  | 14.04 | 73.29 | 80.26 | 86.18 | 73.23 | 94.48 |
| <b>Namibia</b>                  | Windhoek       | 67.34 | 51.13 | 94.81  | 51.24 | 91.42 | 92.63 | 65.69 | 58.36 | 87.50 |
| <b>Nepal</b>                    | Kathmandu      | 57.76 | 53.24 | 91.55  | 51.39 | 92.44 | 93.19 | 95.19 | 97.12 | 93.27 |
| <b>Niger</b>                    | Niamey         | 51.19 | 30.57 | 12.00  | 7.40  | 69.84 | 85.46 | 82.37 | 80.74 | 83.56 |
| <b>Nigeria</b>                  | Lagos          | 4.86  | 27.99 | 94.22  | 65.05 | 77.25 | 88.65 | 80.44 | 61.77 | 80.95 |
| <b>Pakistan-Karachi</b>         | Karachi        | 75.89 | 98.06 | 99.46  | 51.77 | 51.96 | 81.47 | 63.15 | 73.31 | 74.56 |
| <b>Pakistan-Islamabad</b>       | Islamabad      | 21.89 | 93.36 | 92.36  | 64.91 | 65.70 | 84.42 | 83.43 | 77.52 | 86.34 |
| <b>Peru</b>                     | Lima           | 91.79 | 83.75 | 99.22  | 73.94 | 79.96 | 88.12 | 82.04 | 84.93 | 83.40 |
| <b>Philippines</b>              | Manila         | 40.46 | 67.62 | 87.27  | 79.01 | 55.49 | 36.30 | 90.69 | 89.87 | 92.10 |
| <b>Rwanada</b>                  | Kigali         | 36.33 | 41.92 | 5.69   | 20.33 | 94.50 | 92.95 | 98.53 | 98.05 | 97.88 |
| <b>Sao Tome and Principe</b>    | São Tomé       | 47.07 | 42.35 | 49.21  | 2.52  | 78.64 | 83.73 | 88.36 | 78.70 | 85.20 |
| <b>Senegal</b>                  | Dakar          | 82.23 | 43.07 | 74.76  | 8.20  |       |       | 87.18 | 70.83 | 89.44 |

|                     |               |       |       |        |       |       |       |        |       |       |
|---------------------|---------------|-------|-------|--------|-------|-------|-------|--------|-------|-------|
| <b>Sierra Leone</b> | Freetown      | 19.79 | 29.10 | 4.75   | 23.87 | 86.08 | 90.66 | 72.94  | 71.43 | 85.73 |
| <b>Swaziland</b>    | Mbabane       | 67.14 | 51.17 | 69.25  | 43.54 | 95.77 | 96.35 | 93.04  | 63.79 | 94.83 |
| <b>Tajikistan</b>   | Dushanbe      | 96.90 | 93.46 | 99.44  | 62.61 | 57.52 | 66.43 | 92.86  | 88.26 | 95.17 |
| <b>Tanzania</b>     | Dar es Salaam | 12.50 | 19.60 | 24.22  | 9.27  | 80.84 | 93.90 | 100.00 | 96.38 | 98.54 |
| <b>Timor-Leste</b>  | Dili          | 49.89 | 73.18 | 26.93  | 46.70 | 61.37 | 78.08 | 62.50  | 26.22 | 71.53 |
| <b>Uganda</b>       | Kampala       | 33.15 | 19.30 | 21.23  | 26.76 | 87.56 | 91.71 | 76.23  | 63.53 | 85.75 |
| <b>Ukraine</b>      | Kyiv          | 99.59 | 98.90 | 100.00 | 83.48 | 91.77 | 88.11 |        |       |       |
| <b>Zambia</b>       | Lusaka        | 29.60 | 26.00 | 48.96  | 21.17 | 69.33 | 88.27 | 58.46  | 76.25 | 88.85 |
| <b>Zimbabwe</b>     | Harare        | 67.35 | 37.02 | 89.29  | 11.12 | 80.99 | 92.09 | 79.30  | 81.55 | 84.79 |
